# Supplementary material
Source: publisher site journal article supplement (https://www.spandidos-publications.com/7479/downloadSupplementary)
Supplement: Supplementary file 1 [file downloadSupplementary]

Table SI. Sequences for KRT8P12 knockdown and OE.

| Name                 | Forward, 5'-3'                                                | Reverse, 5'-3'                                                |
|----------------------|---------------------------------------------------------------|---------------------------------------------------------------|
| sh-NC                | CCGGTTCTCCGAACGTGTCACGTTTCTCG<br>AGAAACGTGACACGTTCCGAGAAATTTT | AATTAAAAATTCTCCGAACGTGTCACGTTT<br>CTCGAGAAACGTGACACGTTCCGAGAA |
| sh-KR<br>T8P12-<br>1 | CCGGGCATCATCACTGAGGTAAGACTCG<br>AGTCTTTACCTCAGTGATGATGCTTTTT  | AATTAAAAAGCATCATCACTGAGGTAAG<br>ACTCGAGTCTTTACCTCAGTGATGATGC  |
| sh-KR<br>T8P12-<br>2 | CCGGAGGAGAAGGAGCAGATCAAGACTC<br>GAGTCTTGATCTGCTCCTTCTCCTTTTT  | AATTAAAAAAGGAGAAGGAGCAGATCAA<br>GACTCGAGTCTTGATCTGCTCCTTCTCCT |
| sh-KR<br>T8P12-<br>3 | CCGGCAAGAAGGATGTGGATGAAACCTC<br>GAGGTTTCATCCACATCCTTCTGTTTT   | AATTAAAAACAAGAAGGATGTGGATGAAA<br>CCTCGAGGTTTCATCCACATCCTTCTTG |
| OE-KR<br>T8P12       | AATGTACAAGGAATTCGCCACCCAAGAAG<br>CAGCTTCTCTGCTC               | GAATTATCTAGGGATCCTGGTGGAGCTAGC<br>TGAGG                       |

Each sequence that matches the KRT8P12 gene is underlined. The sequences corresponding to OE-KRT8P12 are sequences used for constructing the OE plasmid. KRT8P12, keratin 8 pseudogene 12; OE, overexpression; NC, negative control; sh, short hairpin RNA.

Table SII. Primers for reverse transcription-quantitative PCR.

| Gene    | Forward, 5'-3'        | Reverse, 5'-3'          |
|---------|-----------------------|-------------------------|
| KRT8P12 | AGGCAGTACAAGGAGGTTGC  | ATTGGCATCCTTAACGGCCA    |
| GAPDH   | GGAGCGAGATCCCTCCAAAAT | GGCTGTTGTCATACTTCTCATGG |

KRT8P12, keratin 8 pseudogene 12.
